# Supplementary material for: Functionalized phosphorus analogues of the β-diketiminato ligand systems: bis(N-arylphosphinimino)acetonitrile-derived complexes of rhodium and iridium
Source: Royal Society of Chemistry journal article supplement (doi:10.1039/b802032a), 2008-01-01
Supplement: b802032a.pdf [file b802032a.pdf]

## Functionalized phosphorus analogues of the $\beta$ -diketiminato ligand systems: Bis(*N*-arylphosphinimino)acetonitrile-derived complexes of rhodium and iridium

Kirsten Spannhoff,<sup>a</sup> Gerald Kehr,<sup>a</sup> Seda Kehr,<sup>#a</sup> Roland Fröhlich<sup>#a</sup> and Gerhard Erker\*<sup>a</sup>

### Supporting Informations

#### General

All reactions were carried out in an inert atmosphere (argon) in Schlenk-type glassware or in a glovebox. Solvents were dried and distilled under argon prior use. Bis(*N*-phenylimino-diphenylphosphoranyl)acetonitrile<sup>1</sup> was prepared using the known procedure. The following instruments were used for the physical characterization of the compounds. NMR: Bruker AC 200 P-FT (<sup>31</sup>P: 81.0 MHz), Varian Inova 500 (<sup>1</sup>H: 499.8 MHz, <sup>13</sup>C: 125.7 MHz), Unity Plus 600 (<sup>1</sup>H: 599.9 MHz, <sup>13</sup>C: 150.8 MHz). Most NMR assignments were supported by additional 2D experiments. Melting points: DSC 2010 (TA-Instrument). IR: Varian 3100 FT-IR spectrometer.

#### Lithium[cyano-bis(*N*-phenylimino-diphenylphosphoranyl)methanide] (9)

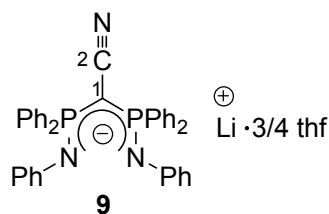

A solution of bis(*N*-phenylimino-diphenylphosphoranyl)acetonitrile (6) (568 mg, 960  $\mu$ mol) and lithiumdiisopropylamide (97 mg, 960  $\mu$ mol) in tetrahydrofuran (60 ml) was stirred overnight at room temperature. The solvent was removed *in vacuo* and the residue washed with pentane (three times, 30 ml each).

The solid light-yellow product was dried *in vacuo* (485 mg, 77%). Mp: 129.5 °C (DSC). Found: C, 74.79; H, 5.65; N, 6.23. Calc. for C<sub>38</sub>H<sub>30</sub>LiN<sub>3</sub>P<sub>2</sub>·3/4 thf: C, 75.57; H, 5.57; N, 6.45%.

$\delta_{\text{H}}$ (499.8 MHz; d<sub>6</sub>-DMSO; 298 K) 7.60 (m, 8H, *o*-Ph<sup>P</sup>), 7.22 (m, 4H, *p*-Ph<sup>P</sup>), 7.09 (m, 8H, *m*-Ph<sup>P</sup>), 7.05 (m, 4H, *m*-Ph<sup>N</sup>), 6.85 (m, 4H, *o*-Ph<sup>N</sup>), 6.53 (m, 2H, *p*-Ph<sup>N</sup>), 3.59 (m, 3H,  $\alpha$ -THF), 1.75 (m, 3H,  $\beta$ -THF).

<sup>1</sup> L. Braun, G. Kehr, R. Fröhlich, G. Erker, *Inorg. Chim. Acta* **2007**, doi: 10.1016/j.ica.2007.02.028.

$\delta_{\text{C}}$  (125.7 MHz;  $d_6$ -DMSO; 298 K) 153.6 (s, *i*-Ph<sup>N</sup>), 135.3 (pd,  $^1J_{\text{PC}} + ^3J_{\text{PC}} = 117.9$  Hz, *i*-Ph<sup>P</sup>), 132.3 (m, *o*-Ph<sup>P</sup>), 129.5 (s, *p*-Ph<sup>P</sup>), 128.3 (m, C2), 128.1 (s, *m*-Ph<sup>N</sup>), 127.0 (m, *m*-Ph<sup>P</sup>), 123.6 (m, *o*-Ph<sup>N</sup>), 114.4 (s, *p*-Ph<sup>N</sup>), 67.0 (s,  $\alpha$ -THF), 25.1 (s,  $\beta$ -THF), 18.0 (t,  $^1J_{\text{PC}} = 97.8$  Hz, C1).

$\delta_{\text{P}\{1\text{H}\}}$  (81.0 MHz;  $d_6$ -DMSO; 298 K) 4.8 (s,  $\nu_{1/2} = 11.9$  Hz).

$\delta_{\text{Hirr}} / \delta_{\text{Hres}}$  (1D-TOCSY, 499.8 MHz,  $d_6$ -DMSO, 298 K) 7.60 / 7.22, 7.09 (*o*-Ph<sup>P</sup> / *p*-Ph<sup>P</sup>, *m*-Ph<sup>P</sup>), 6.53 / 7.05, 6.85 (*p*-Ph<sup>N</sup> / *m*-Ph<sup>N</sup>, *o*-Ph<sup>N</sup>).

$\delta_{\text{H}} / \delta_{\text{H}}$  (GCOSY, 599.6 MHz / 599.6 MHz,  $d_6$ -DMSO, 298 K) 7.60 / 7.09 (*o*-Ph<sup>P</sup> / *m*-Ph<sup>P</sup>), 7.22 / 7.09 (*p*-Ph<sup>P</sup> / *m*-Ph<sup>P</sup>), 7.09 / 7.60, 7.22 (*m*-Ph<sup>P</sup> / *o*-Ph<sup>P</sup>, *p*-Ph<sup>P</sup>), 7.05 / 6.85, 6.53 (*m*-Ph<sup>N</sup> / *o*-Ph<sup>N</sup>, *p*-Ph<sup>N</sup>), 6.85 / 7.05 (*o*-Ph<sup>N</sup> / *m*-Ph<sup>N</sup>), 6.53 / 7.05 (*p*-Ph<sup>N</sup> / *m*-Ph<sup>N</sup>), 3.59 / 1.67 ( $\alpha$ -THF /  $\beta$ -THF).

$\delta_{\text{H}} / \delta_{\text{C}}$  ( $^1\text{H}$ ,  $^{13}\text{C}$ -GHSQC, 499.8 MHz / 125.7 MHz,  $d_6$ -DMSO, 298 K) 7.60 / 132.3 (*o*-Ph<sup>P</sup>), 7.22 / 129.5 (*p*-Ph<sup>P</sup>), 7.09 / 127.0 (*m*-Ph<sup>P</sup>), 7.05 / 128.1 (*m*-Ph<sup>N</sup>), 6.85 / 123.6 (*o*-Ph<sup>N</sup>), 6.53 / 114.4 (*p*-Ph<sup>N</sup>), 3.59 / 67.0 ( $\alpha$ -THF), 1.75 / 25.1 ( $\beta$ -THF).

$\delta_{\text{H}} / \delta_{\text{C}}$  ( $^1\text{H}$ ,  $^{13}\text{C}$ -GHMBC, 599.6 MHz / 150.7 MHz,  $d_6$ -DMSO, 298 K) 7.60 / 135.3, 132.3, 129.5, 127.0 (*o*-Ph<sup>P</sup> / *i*-Ph<sup>P</sup>, *o*-Ph<sup>P</sup>, *p*-Ph<sup>P</sup>, *m*-Ph<sup>P</sup>), 7.22 / 132.3, 127.0 (*p*-Ph<sup>P</sup> / *o*-Ph<sup>P</sup>, *m*-Ph<sup>P</sup>), 7.09 / 135.3, 132.3, 129.5, 127.0 (*p*-Ph<sup>P</sup> / *i*-Ph<sup>P</sup>, *o*-Ph<sup>P</sup>, *p*-Ph<sup>P</sup>, *m*-Ph<sup>P</sup>), 7.05 / 153.6, 128.1 (*m*-Ph<sup>N</sup> / *i*-Ph<sup>N</sup>, *m*-Ph<sup>N</sup>), 6.85 / 114.4 (*o*-Ph<sup>N</sup> / *p*-Ph<sup>N</sup>), 6.53 / 123.6, 128.1 (*p*-Ph<sup>N</sup> / *o*-Ph<sup>N</sup>, *m*-Ph<sup>N</sup>)  
 $\nu_{\text{max}}(\text{KBr})/\text{cm}^{-1}$  3054, 3006, 2972, 2873, 2159, 1590, 1483, 1436, 1288, 1262, 1205, 1179, 1106, 1036, 1012, 746, 717, 693.

### General procedure for the synthesis of the complexes **11**, **12**, and **13**

Either [(CO)<sub>2</sub>RhCl]<sub>2</sub> (**10a**) or [(nbd)]RhCl<sub>2</sub> (**10b**) or [(cod)]IrCl<sub>2</sub> (**10c**) (93.3  $\mu\text{mol}$ , 0.5 equiv.) was added to a suspension of lithium[cyano-bis(*N*-phenylimino-diphenylphosphoranyl)methanide] (**9**) (186.6  $\mu\text{mol}$ , 1.0 equiv.) in toluene (15 ml). The reaction mixture was stirred for 12 hours at room temperature. Subsequently the insoluble LiCl was removed by filtration, the solvent removed *in vacuo* and the solid washed with pentane (three times, 6 ml each). The resulting yellow solid was dried *in vacuo*.

### Dicarbonyl[cyano-bis(*N*-phenylimino-diphenylphosphoranyl)methanide]rhodium(I) (**11**)

A mixture of the lithium salt **9** (118 mg, 186.6  $\mu\text{mol}$ , 1.0 equiv.) and  $\mu$ -dichlorotetracarbonyldirhodium (I) (**10a**) (36 mg, 93.3  $\mu\text{mol}$ , 0.5 equiv.) in toluene (15 ml) formed the yellow, air-stable product **11** (90 mg, 64%). Single crystals were obtained from a

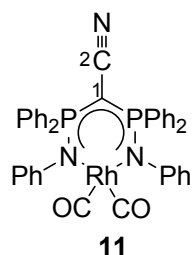

toluene/pentane mixture at  $-35\text{ }^{\circ}\text{C}$ . Mp:  $> 200\text{ }^{\circ}\text{C}$  (DSC). Found: C, 63.30; H, 4.03; N, 5.13. Calc. for  $\text{C}_{40}\text{H}_{30}\text{N}_3\text{O}_2\text{P}_2\text{Rh}$ : C, 64.10; H, 4.03; N, 5.61%.

$\delta_{\text{H}}$  (499.8 MHz;  $\text{CD}_2\text{Cl}_2$ ; 298 K) 7.71 (m, 8H, *o*-Ph<sup>P</sup>), 7.48 (m, 4H, *p*-Ph<sup>P</sup>), 7.33 (m, 8H, *m*-Ph<sup>P</sup>), 7.12 (m, 4H, *o*-Ph<sup>N</sup>), 7.02 (m, 4H, *m*-Ph<sup>N</sup>), 6.84 (m, 2H, *p*-Ph<sup>N</sup>).

$\delta_{\text{C}}$  (125.7 MHz;  $\text{CD}_2\text{Cl}_2$ ; 298 K) 185.1 (d,  $^1J_{\text{RhC}} = 69.9\text{ Hz}$ , Rh-CO), 152.0 (s, *i*-Ph<sup>N</sup>), 133.2 (m, *o*-Ph<sup>P</sup>), 132.3 (s, *p*-Ph<sup>P</sup>), 129.2 (pd,  $^1J_{\text{PC}} + ^3J_{\text{PC}} = 95.1\text{ Hz}$ , *i*-Ph<sup>P</sup>), 128.8 (m, *m*-Ph<sup>P</sup>), 128.8 (s, *m*-Ph<sup>N</sup>), 124.4 (m, *o*-Ph<sup>N</sup>), 121.5 (s, *p*-Ph<sup>N</sup>), 123.1 (t,  $^2J_{\text{PC}} = 9.3\text{ Hz}$ , C2), 21.6 (t,  $^1J_{\text{PC}} = 145.6\text{ Hz}$ , C1).

$\delta_{\text{P}\{1\text{H}\}}$  (81.0 MHz;  $\text{CD}_2\text{Cl}_2$ ; 298 K) 29.3 (s,  $\nu_{1/2} = 2.3\text{ Hz}$ ).

$\delta_{\text{Hirr}} / \delta_{\text{Hres}}$  (1D-TOCSY, 499.8 MHz,  $\text{CD}_2\text{Cl}_2$ , 298 K) 7.48 / 7.71, 7.33 (*p*-Ph<sup>P</sup> / *o*-Ph<sup>P</sup>, *m*-Ph<sup>P</sup>), 7.02 / 7.12, 6.84 (*m*-Ph<sup>N</sup> / *o*-Ph<sup>N</sup>, *p*-Ph<sup>N</sup>).

$\delta_{\text{H}} / \delta_{\text{H}}$  (GCOSY, 499.8 MHz / 499.8 MHz,  $\text{CD}_2\text{Cl}_2$ , 298 K) 7.71 / 7.33 (*o*-Ph<sup>P</sup> / *m*-Ph<sup>P</sup>), 7.48 / 7.33 (*p*-Ph<sup>P</sup> / *m*-Ph<sup>P</sup>), 7.33 / 7.71, 7.48 (*m*-Ph<sup>P</sup> / *o*-Ph<sup>P</sup>, *p*-Ph<sup>P</sup>), 7.12 / 7.02 (*o*-Ph<sup>N</sup> / *m*-Ph<sup>N</sup>), 7.02 / 7.12, 6.84 (*m*-Ph<sup>N</sup> / *o*-Ph<sup>N</sup>, *p*-Ph<sup>N</sup>), 6.84 / 7.02 (*p*-Ph<sup>N</sup> / *m*-Ph<sup>N</sup>).

$\delta_{\text{H}} / \delta_{\text{C}}$  ( $^1\text{H}$ ,  $^{13}\text{C}$ -GHSQC, 499.8 MHz / 125.7 MHz,  $\text{CD}_2\text{Cl}_2$ , 298 K) 7.71 / 133.2 (*o*-Ph<sup>P</sup>), 7.48 / 132.3 (*p*-Ph<sup>P</sup>), 7.33 / 128.8 (*m*-Ph<sup>P</sup>), 7.12 / 124.4 (*o*-Ph<sup>N</sup>), 7.02 / 128.8 (*m*-Ph<sup>N</sup>), 6.84 / 121.5 (*p*-Ph<sup>N</sup>).

$\delta_{\text{H}} / \delta_{\text{C}}$  ( $^1\text{H}$ ,  $^{13}\text{C}$ -GHMBC, 499.8 MHz / 125.7 MHz,  $\text{CD}_2\text{Cl}_2$ , 298 K) 7.71 / 133.2, 132.3, 129.2, 128.8 (*o*-Ph<sup>P</sup> / *o*-Ph<sup>P</sup>, *p*-Ph<sup>P</sup>, *i*-Ph<sup>P</sup>, *m*-Ph<sup>P</sup>), 7.48 / 133.2, 128.8 (*p*-Ph<sup>P</sup> / *o*-Ph<sup>P</sup>, *m*-Ph<sup>P</sup>), 7.33 / 133.2, 132.3, 129.2, 128.8 (*m*-Ph<sup>P</sup> / *o*-Ph<sup>P</sup>, *p*-Ph<sup>P</sup>, *i*-Ph<sup>P</sup>, *m*-Ph<sup>P</sup>), 7.12 / 128.8, 124.4, 121.5 (*o*-Ph<sup>N</sup> / *m*-Ph<sup>N</sup>, *o*-Ph<sup>N</sup>, *p*-Ph<sup>N</sup>), 7.02 / 152.0, 128.8 (*m*-Ph<sup>N</sup> / *i*-Ph<sup>N</sup>, *m*-Ph<sup>N</sup>), 6.84 / 128.8, 124.4 (*p*-Ph<sup>N</sup> / *m*-Ph<sup>N</sup>, *o*-Ph<sup>N</sup>).

$\nu_{\text{max}}$ (KBr)/ $\text{cm}^{-1}$  3057, 2165, 2061, 1989, 1589, 1483, 1435, 1259, 1175, 1102, 1009, 989, 803, 721, 690.

Crystal data for  $\text{C}_{40}\text{H}_{30}\text{N}_3\text{O}_2\text{P}_2\text{Rh}$ ,  $M = 749.52$ , monoclinic, space group  $P2_1/c$  (No. 14),  $a = 9.8125(2)$ ,  $b = 20.4272(5)$ ,  $c = 17.5318(2)\text{ \AA}$ ,  $\beta = 102.278(2)^{\circ}$ ,  $V = 3433.73(12)\text{ \AA}^3$ ,  $D_c = 1.450\text{ g cm}^{-3}$ ,  $\mu = 0.631\text{ mm}^{-1}$ ,  $Z = 4$ ,  $\lambda = 0.71073\text{ \AA}$ ,  $T = 198(2)\text{ K}$ , 22757 reflections collected ( $\pm h$ ,  $\pm k$ ,  $\pm l$ ),  $[(\sin\theta)/\lambda] = 0.66\text{ \AA}^{-1}$ , 8114 independent ( $R_{\text{int}} = 0.056$ ), and 5740 observed reflections [ $I \geq 2\sigma(I)$ ], 433 refined parameters,  $R = 0.044$ ,  $wR^2 = 0.100$ . CCDC.

**Norbornadiene[cyano-bis(*N*-phenylimino-diphenylphosphoranyl)-methanide]-rhodium(I) (**12**)**

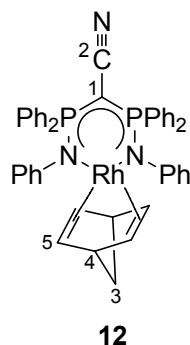

A mixture of the lithium salt **9** (118 mg, 186.6  $\mu\text{mol}$ , 1.0 equiv.) and  $\mu$ -dichlorobis(norbornadiene)dirhodium(I) (**10b**) (43 mg, 93.3  $\mu\text{mol}$ , 0.5 Äq.) in toluene (15 ml) formed the yellow, air-stable product **12** (109 mg, 74%). Single crystals of **12** suited for the X-ray crystal structure analysis were obtained from a toluene/pentane mixture at  $-35\text{ }^\circ\text{C}$ . Mp:  $> 200^\circ\text{C}$  (DSC). Found: C, 68.11; H, 5.11; N, 5.14. Calc. for  $\text{C}_{45}\text{H}_{38}\text{N}_3\text{P}_2\text{Rh}$ : C, 68.79; H, 4.88; N, 5.35%.

$\delta_{\text{H}}$ (599.6 MHz;  $\text{CD}_2\text{Cl}_2$ ; 298 K) 7.93 (m, 8H, *o*-Ph<sup>P</sup>), 7.55 (m, 4H, *p*-Ph<sup>P</sup>), 7.47 (m, 8H, *m*-Ph<sup>P</sup>), 6.76 (m, 4H, *m*-Ph<sup>N</sup>), 6.63 (m, 2H, *p*-Ph<sup>N</sup>), 6.16 (m, 4H, *o*-Ph<sup>N</sup>), 3.44 (m, 2H, 4-H), 2.78 (m, 4H, 5-H), 0.94 (m, 2H, 3-H).

$\delta_{\text{C}}$ (125.7 MHz;  $\text{CD}_2\text{Cl}_2$ ; 298 K) 149.3 (s, *i*-Ph<sup>N</sup>), 133.8 (m, *o*-Ph<sup>P</sup>), 132.9 (pd,  $^1J_{\text{PC}} + ^3J_{\text{PC}} = 102.4\text{ Hz}$ , *i*-Ph<sup>P</sup>), 131.9 (s, *p*-Ph<sup>P</sup>), 128.5 (m, *o*-Ph<sup>N</sup>), 128.4 (m, *m*-Ph<sup>P</sup>), 127.7 (s, *m*-Ph<sup>N</sup>), 124.6 (t,  $^2J_{\text{PC}} = 9.4\text{ Hz}$ , C2), 121.5 (s, *p*-Ph<sup>N</sup>), 61.3 (d,  $^3J_{\text{RhC}} = 7.0\text{ Hz}$ , C3), 52.5 (d,  $^1J_{\text{RhC}} = 10.6\text{ Hz}$ , C5), 49.0 (d,  $^2J_{\text{RhC}} = 2.8\text{ Hz}$ , C4), 25.3 (t,  $^1J_{\text{PC}} = 136.5\text{ Hz}$ , C1).

$\delta_{\text{P}\{1\text{H}\}}$ (81.0 MHz,  $\text{CD}_2\text{Cl}_2$ , 298 K) 29.4 (s,  $\nu_{1/2} = 3.9\text{ Hz}$ ).

$\delta_{\text{Hirr}} / \delta_{\text{Hres}}$  (1D-TOCSY, 599.6 MHz,  $\text{CD}_2\text{Cl}_2$ , 298 K) 7.93 / 7.55, 7.47 (*o*-Ph<sup>P</sup> / *p*-Ph<sup>P</sup>, *m*-Ph<sup>P</sup>), 6.76 / 6.63, 6.16 (*m*-Ph<sup>N</sup> / *p*-Ph<sup>N</sup>, *o*-Ph<sup>N</sup>), 3.44 / 2.78, 0.94 (4-H / 5-H, 3-H).

$\delta_{\text{H}} / \delta_{\text{H}}$  (GCOSY, 599.6 MHz,  $\text{CD}_2\text{Cl}_2$ , 298 K) 7.93 / 7.47 (*o*-Ph<sup>P</sup> / *m*-Ph<sup>P</sup>), 7.55 / 7.47 (*p*-Ph<sup>P</sup> / *m*-Ph<sup>P</sup>), 7.47 / 7.93, 7.55 (*m*-Ph<sup>P</sup> / *o*-Ph<sup>P</sup>, *p*-Ph<sup>P</sup>), 6.76 / 6.63, 6.16 (*m*-Ph<sup>N</sup> / *p*-Ph<sup>N</sup>, *o*-Ph<sup>N</sup>), 6.63 / 6.76 (*p*-Ph<sup>N</sup> / *m*-Ph<sup>N</sup>), 6.16 / 6.76 (*o*-Ph<sup>N</sup> / *m*-Ph<sup>N</sup>), 3.44 / 2.78, 0.94 (4-H / 5-H, 3-H), 2.78 / 3.44 (5-H / 4-H), 0.94 / 3.44 (3-H / 4-H).

$\delta_{\text{H}} / \delta_{\text{C}}$  ( $^1\text{H}$ ,  $^{13}\text{C}$ -GHSQC, 599.6 MHz / 150.8 MHz,  $\text{CD}_2\text{Cl}_2$ , 298 K) 7.93 / 133.8 (*o*-Ph<sup>P</sup>), 7.55 / 131.9 (*p*-Ph<sup>P</sup>), 7.47 / 128.4 (*m*-Ph<sup>P</sup>), 6.76 / 127.7 (*m*-Ph<sup>N</sup>), 6.63 / 121.5 (*p*-Ph<sup>N</sup>), 6.16 / 128.5 (*o*-Ph<sup>N</sup>), 3.44 / 49.0 (4-H / C4), 2.78 / 52.5 (5-H / C5), 0.94 / 61.3 (3-H / C3).

$\delta_{\text{H}} / \delta_{\text{C}}$  ( $^1\text{H}$ ,  $^{13}\text{C}$ -GHMBC, 599.6 MHz / 150.8 MHz,  $\text{CD}_2\text{Cl}_2$ , 298 K) 7.93 / 133.8, 132.9, 131.9, 128.4 (*o*-Ph<sup>P</sup> / *o*-Ph<sup>P</sup>, *i*-Ph<sup>P</sup>, *p*-Ph<sup>P</sup>, *m*-Ph<sup>P</sup>), 7.55 / 133.8, 132.7, 128.4 (*p*-Ph<sup>P</sup> / *o*-Ph<sup>P</sup>, *i*-Ph<sup>P</sup>, *m*-Ph<sup>P</sup>), 7.47 / 133.8, 132.9, 128.4 (*m*-Ph<sup>P</sup> / *o*-Ph<sup>P</sup>, *i*-Ph<sup>P</sup>, *m*-Ph<sup>P</sup>), 6.76 / 149.3, 128.5, 127.7, 121.5 (*m*-Ph<sup>N</sup> / *i*-Ph<sup>N</sup>, *o*-Ph<sup>N</sup>, *m*-Ph<sup>N</sup>, *p*-Ph<sup>N</sup>), 6.63 / 128.5, 127.7 (*p*-Ph<sup>N</sup> / *o*-Ph<sup>N</sup>, *m*-Ph<sup>N</sup>), 6.16 / 149.3, 128.5, 127.7, 121.5 (*m*-Ph<sup>N</sup> / *i*-Ph<sup>N</sup>, *o*-Ph<sup>N</sup>, *m*-Ph<sup>N</sup>, *p*-Ph<sup>N</sup>), 2.78 / 61.3, 52.5, 49.0 (5-H / C3, C5, C4), 0.94 / 52.5, 49.0 (3-H / C5, C4).

$\nu_{\text{max}}$ (KBr)/ $\text{cm}^{-1}$  3054, 3003, 2953, 2908, 2851, 2148, 1588, 1482, 1435, 1257, 1233, 1196, 1107, 1010, 986, 803, 745, 668.

Crystal data for  $C_{45}H_{38}N_3P_2Rh \cdot C_7H_8$ ,  $M = 877.77$ , monoclinic, space group  $P2_1/c$  (No. 14),  $a = 9.9780(1)$ ,  $b = 20.7312(3)$ ,  $c = 41.3429(7)$  Å,  $\beta = 91.050(1)^\circ$ ,  $V = 8550.6(2)$  Å<sup>3</sup>,  $D_c = 1.364$  g cm<sup>-3</sup>,  $\mu = 4.237$  mm<sup>-1</sup>,  $Z = 8$ ,  $\lambda = 1.54178$  Å,  $T = 223(2)$  K, 78803 reflections collected ( $\pm h$ ,  $\pm k$ ,  $\pm l$ ),  $[(\sin\theta)/\lambda] = 0.60$  Å<sup>-1</sup>, 15282 independent ( $R_{int} = 0.128$ ), and 10879 observed reflections [ $I \geq 2\sigma(I)$ ], 1018 refined parameters,  $R = 0.063$ ,  $wR^2 = 0.165$ . CCDC.

### Cyclooctadiene[cyano-bis(*N*-phenylimino-diphenylphosphoranyl)methanide]iridium(I) (13)

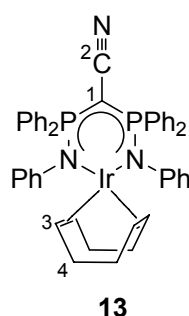

Reaction of the lithium salt **9** (120 mg, 186.6  $\mu$ mol, 1.0 equiv.) and  $\mu$ -dichlorobis(1,5-cyclooctadiene)diiridium(I) (**10c**) (63 mg, 93.3  $\mu$ mol, 0.5 equiv.) in toluene (15 ml) yielded the yellow, air-stable product **13** (110 mg, 66%). Single crystals were obtained from a toluene/pentane mixture at  $-35$  °C. Mp:  $> 200$  °C (DSC). Found: C, 61.42; H, 4.92; N, 4.22. Calc. for  $C_{46}H_{42}IrN_3P_2$ : C, 62.01; H, 4.75; N, 4.72%.

$\delta_H$ (499.8 MHz;  $CD_2Cl_2$ ; 298 K) 7.84 (m, 8H, *o*-Ph<sup>P</sup>), 7.55 (m, 4H, *p*-Ph<sup>P</sup>), 7.44 (m, 8H, *m*-Ph<sup>P</sup>), 6.75 (m, 4H, *m*-Ph<sup>N</sup>), 6.68 (m, 2H, *p*-Ph<sup>N</sup>), 6.12 (m, 4H, *o*-Ph<sup>N</sup>), 2.95 (m, 4H, 3-H), 2.00 (m, 4H, 4-H), 1.24 (m, 4H, 4'-H).

$\delta_C$ (125.7 MHz;  $CD_2Cl_2$ ; 298 K) 148.4 (s, *i*-Ph<sup>N</sup>), 134.2 (m, *o*-Ph<sup>P</sup>), 132.9 (pd,  $^1J_{PC} + ^3J_{PC} = 104.8$  Hz, *i*-Ph<sup>P</sup>), 132.2 (s, *p*-Ph<sup>P</sup>), 129.9 (m, *o*-Ph<sup>N</sup>), 128.5 (m, *m*-Ph<sup>P</sup>), 127.5 (s, *m*-Ph<sup>N</sup>), 122.5 (s, *p*-Ph<sup>N</sup>), 124.1 (t,  $^2J_{PC} = 7.9$  Hz, C2), 60.4 (s, C3), 31.1 (s, C4), 24.6 (t,  $^1J_{PC} = 130.7$  Hz, C1).

$\delta_{P\{1H\}}$ (81.0 MHz;  $CD_2Cl_2$ ; 298 K) 32.0 (s,  $v_{1/2} = 1.9$  Hz).

$\delta_{Hirr} / \delta_{Hres}$  (1D-TOCSY, 499.8 MHz,  $CD_2Cl_2$ , 298 K) 7.55 / 7.84, 7.44 (*p*-Ph<sup>P</sup> / *o*-Ph<sup>P</sup>, *m*-Ph<sup>P</sup>), 6.68 / 6.75, 6.12 (*p*-Ph<sup>N</sup> / *m*-Ph<sup>N</sup>, *o*-Ph<sup>N</sup>), 1.24 / 2.95, 2.00 (4'-H / 3-H, 4-H).

$\delta_H / \delta_H$  (GCOSY, 499.8 MHz,  $CD_2Cl_2$ , 298 K) 7.84 / 7.44 (*o*-Ph<sup>P</sup> / *m*-Ph<sup>P</sup>), 7.55 / 7.44 (*p*-Ph<sup>P</sup> / *m*-Ph<sup>P</sup>), 7.44 / 7.84, 7.55 (*m*-Ph<sup>P</sup> / *o*-Ph<sup>P</sup>, *p*-Ph<sup>P</sup>), 6.75 / 6.68, 6.12 (*m*-Ph<sup>N</sup> / *p*-Ph<sup>N</sup>, *o*-Ph<sup>N</sup>), 6.68 / 6.75 (*p*-Ph<sup>N</sup> / *m*-Ph<sup>N</sup>), 6.12 / 6.75 (*o*-Ph<sup>N</sup> / *m*-Ph<sup>N</sup>), 2.95 / 2.00, 1.24 (3-H / 4-H, 4'-H), 2.00 / 2.95, 1.24 (4-H / 3-H, 4'-H), 1.24 / 2.95, 1.24 (4'-H / 3-H, 4-H).

$\delta_H / \delta_C$  ( $^1H, ^{13}C$ -GHSQC, 499.8 MHz / 125.7 MHz,  $CD_2Cl_2$ , 298 K) 7.84 / 134.2 (*o*-Ph<sup>P</sup>), 7.55 / 132.2 (*p*-Ph<sup>P</sup>), 7.44 / 128.5 (*m*-Ph<sup>P</sup>), 6.75 / 127.5 (*m*-Ph<sup>N</sup>), 6.68 / 122.5 (*p*-Ph<sup>N</sup>), 6.12 / 129.9 (*o*-Ph<sup>N</sup>), 2.95 / 60.4 (3-H / C3), 2.00 / 31.1 (4-H / C4), 1.24 / 31.1 (4'-H / C4).

$\delta_H / \delta_C$  ( $^1H, ^{13}C$ -GHMBC, 499.8 MHz / 125.7 MHz,  $CD_2Cl_2$ , 298 K) 7.84 / 134.2, 132.9, 132.2 (*o*-Ph<sup>P</sup> / *o*-Ph<sup>P</sup>, *i*-Ph<sup>P</sup>, *p*-Ph<sup>P</sup>), 7.55 / 134.2 (*p*-Ph<sup>P</sup> / *o*-Ph<sup>P</sup>), 7.44 / 134.2, 132.9, 132.2, 128.5 (*m*-Ph<sup>P</sup> / *o*-Ph<sup>P</sup>, *i*-Ph<sup>P</sup>, *p*-Ph<sup>P</sup>, *m*-Ph<sup>P</sup>), 6.75 / 148.4, 127.5 (*m*-Ph<sup>N</sup> / *i*-Ph<sup>N</sup>, *m*-Ph<sup>N</sup>), 6.68 / 129.9

(*p*-Ph<sup>N</sup> / *o*-Ph<sup>N</sup>), 6.12 / 148.4, 129.9, 122.5 (*m*-Ph<sup>N</sup> / *i*-Ph<sup>N</sup>, *o*-Ph<sup>N</sup>, *p*-Ph<sup>N</sup>), 2.95 / 31.1 (3-H / C4), 2.00 / 60.4, 31.1 (4-H / C3, C4), 1.24 / 60.4, 31.1 (4'-H / C3, C4).

$\nu_{\max}(\text{KBr})/\text{cm}^{-1}$  3052, 2911, 2878, 2830, 2154, 1588, 1482, 1436, 1231, 1206, 1108, 1012, 982, 808, 748, 693.

Crystal data for C<sub>46</sub>H<sub>42</sub>IrN<sub>3</sub>P<sub>2</sub> \* C<sub>7</sub>H<sub>8</sub>,  $M = 983.10$ , monoclinic, space group  $P2_1/c$  (No. 14),  $a = 19.7081(2)$ ,  $b = 11.3012(1)$ ,  $c = 21.4893(2)$  Å,  $\beta = 111.446(1)^\circ$ ,  $V = 4454.82(7)$  Å<sup>3</sup>,  $D_c = 1.466$  g cm<sup>-3</sup>,  $\mu = 3.108$  mm<sup>-1</sup>,  $Z = 4$ ,  $\lambda = 0.71073$  Å,  $T = 223(2)$  K, 41726 reflections collected ( $\pm h, \pm k, \pm l$ ),  $[(\sin\theta)/\lambda] = 0.66$  Å<sup>-1</sup>, 10575 independent ( $R_{\text{int}} = 0.053$ ), and 8671 observed reflections [ $I \geq 2\sigma(I)$ ], 533 refined parameters,  $R = 0.029$ ,  $wR^2 = 0.072$ .
